# Supplementary material for: Medusa-Aqua system: simultaneous measurement and evaluation of novel potential halogenated transient tracers HCFCs, HFCs and PFCs in the ocean
Source: Copernicus journal article supplement (doi:10.5194/os-2019-101), 2019-10-11
Supplement: Supplementary file 1 [file os-2019-101-supplement.zip]

# Medusa-aqua system: simultaneous measurement and evaluation of novel potential halogenated transient tracers HCFCs, HFCs and PFCs in the ocean

Pingyang Li<sup>1</sup>, Toste Tanhua<sup>1</sup>

<sup>1</sup> Marine Biogeochemistry, GEOMAR Helmholtz Centre for Ocean Research Kiel, Kiel 24105, Germany

Correspondence to: Toste Tanhua (ttanhua@geomar.de)

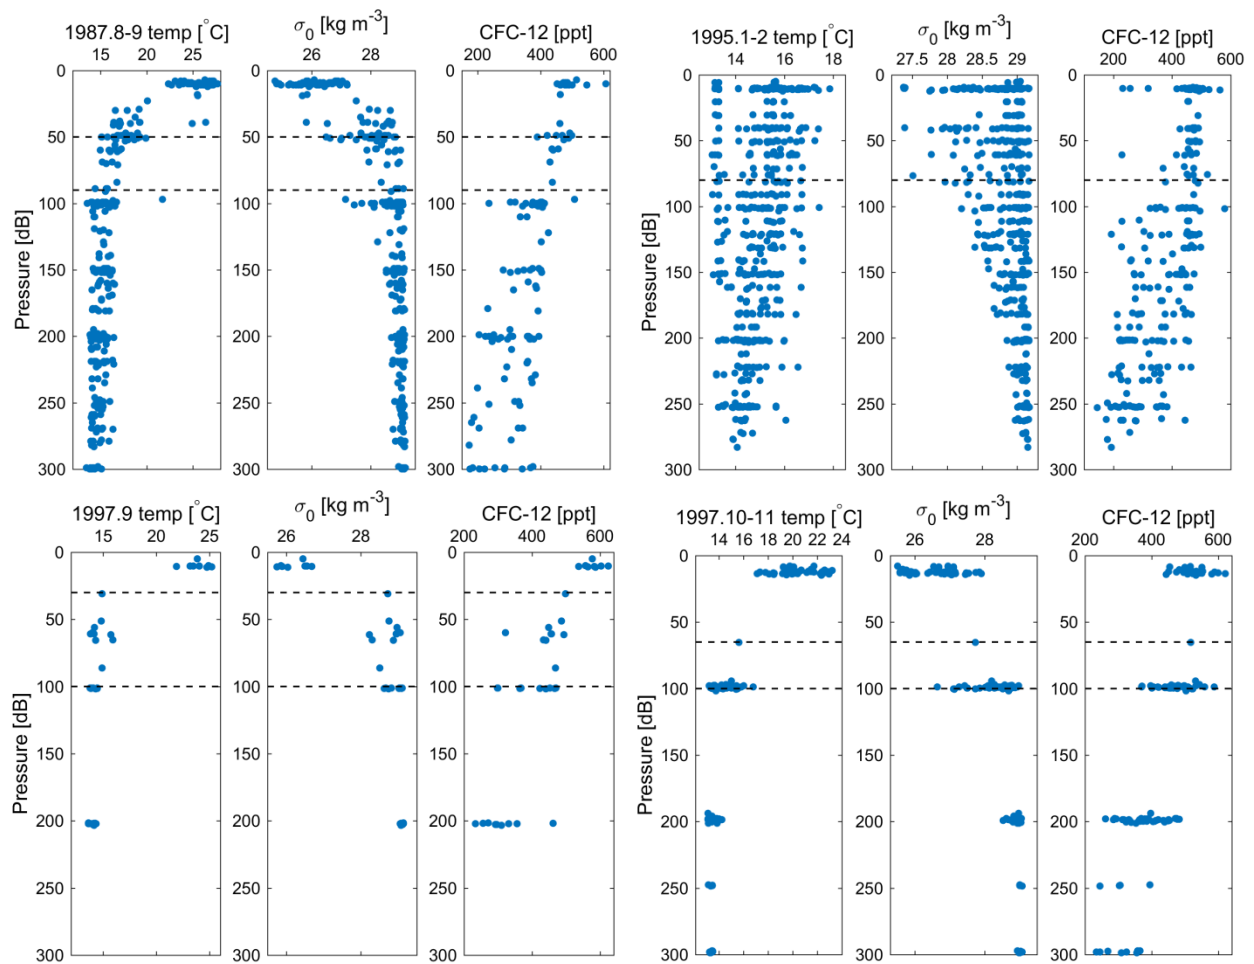

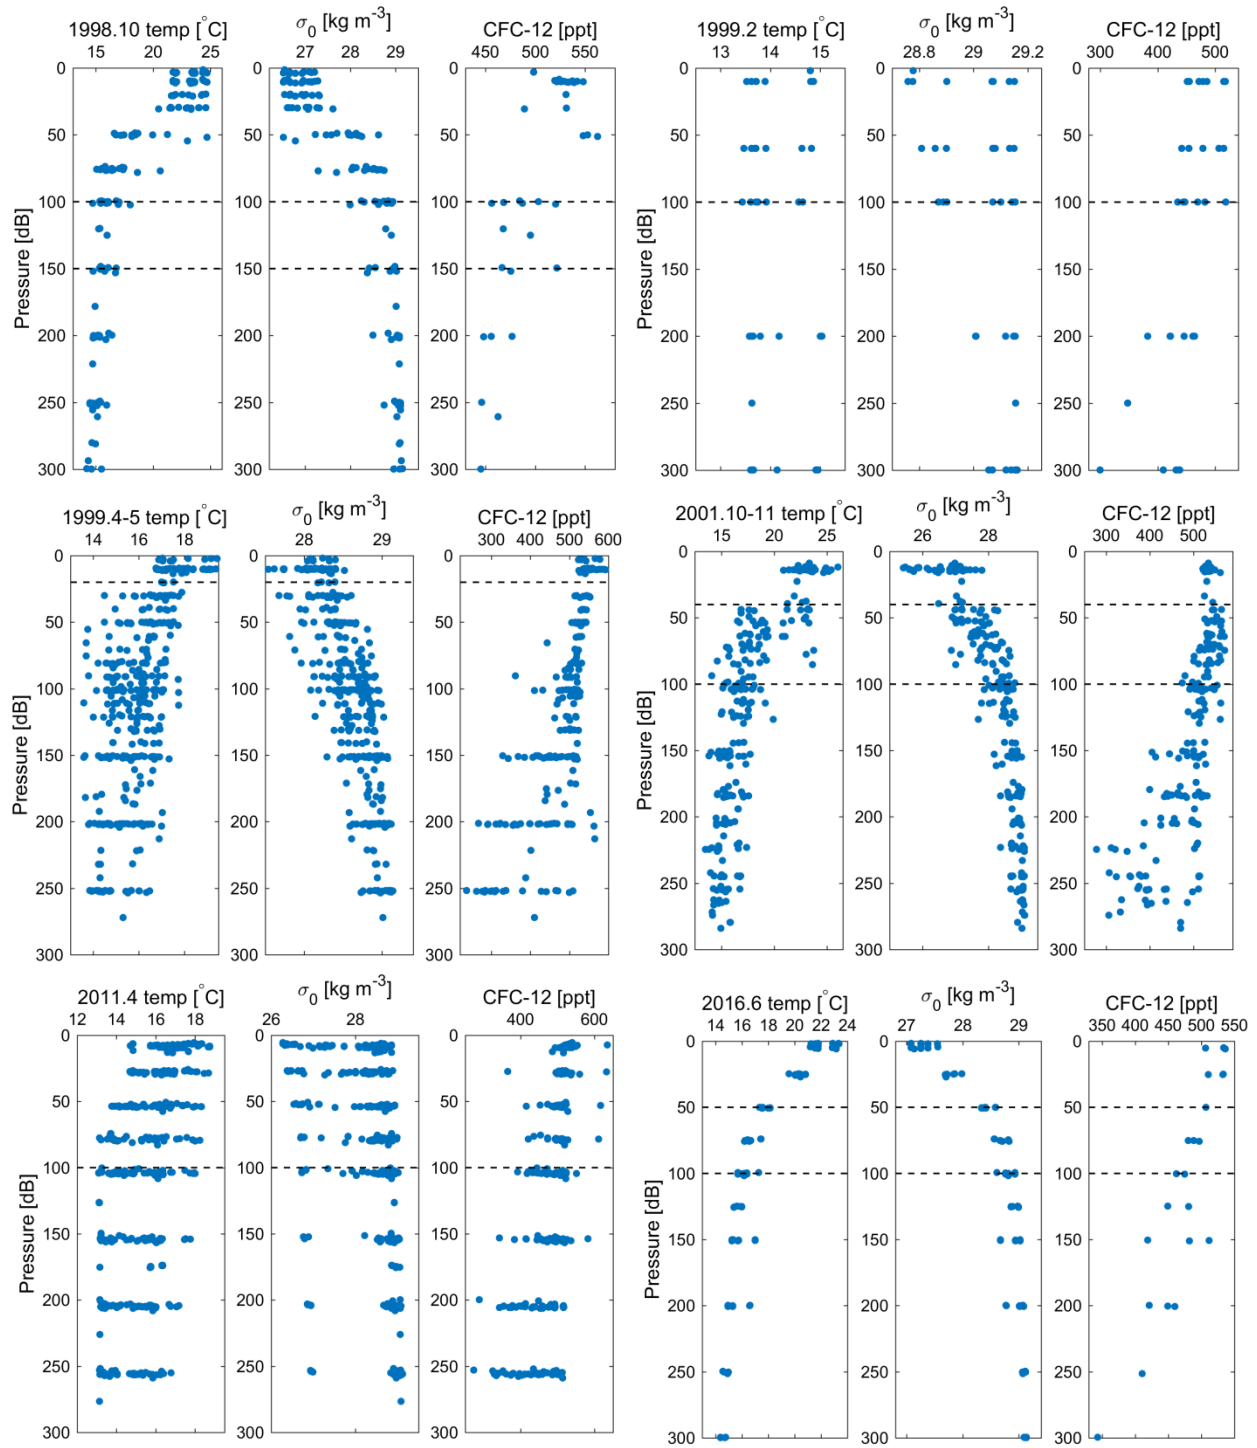

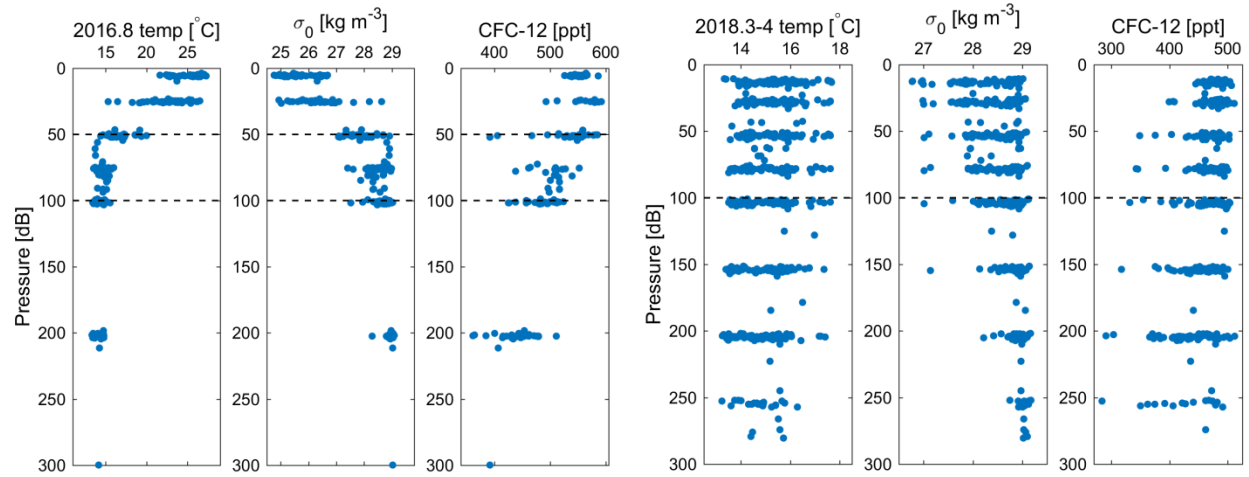

**Figure S1.** Profiles of temperature, potential density and concentrations of CFC-12 for each historical cruise in the Mediterranean Sea to determine the depth ranges of winter mixed layers.

**Table S1.** Bottle data of SF<sub>6</sub> and CFC-12 in profiles 51, 53, 83, 85, 105 and 107 measured by the PT-GC-ECD and CFC-12, HCFC-22, HCFC-141b, HCFC-142b, HFC-134a and HFC-125 in profiles 52, 84 and 106 measured by the Medusa-Aqua system from cruise MSM72 (see the Excel file) <sup>a</sup>

<sup>a</sup> Meaning of the quality flag, this is modified from the WOCE flagging system ([https://cchdo.github.io/hdo-assets/documentation/manuals/pdf/90\\_1/chap4.pdf](https://cchdo.github.io/hdo-assets/documentation/manuals/pdf/90_1/chap4.pdf), last access: 13 September 2019) only in that we added flag “5” for the purpose of this study

| Quality flag number | Meaning                                                                                                                               |
|---------------------|---------------------------------------------------------------------------------------------------------------------------------------|
| 2                   | Normal data; data for sampling sites that measured CFC-12 by Medusa-Aqua system matched the one by PT-GC-ECD                          |
| 3                   | Questionable data: may not fit profile or some other doubts                                                                           |
| 4                   | Problem data definitely                                                                                                               |
| 5                   | Data for sampling sites that measured CFC-12 by Medusa-Aqua system doesn't matched the one by PT-GC-ECD; data quality between 2 and 3 |
| 6                   | Mean of two or more measurements                                                                                                      |
| 9                   | Missing (null) data                                                                                                                   |
